# Supplementary material for: Antiskin Inflammatory Activity of Black Ginger (Kaempferia parviflora) through Antioxidative Activity
Source: Hindawi journal article supplement (doi:10.1155/2018/5967150), 2018-01-01

# SUPPLEMENTARY FIGURE 1

## Standard 1

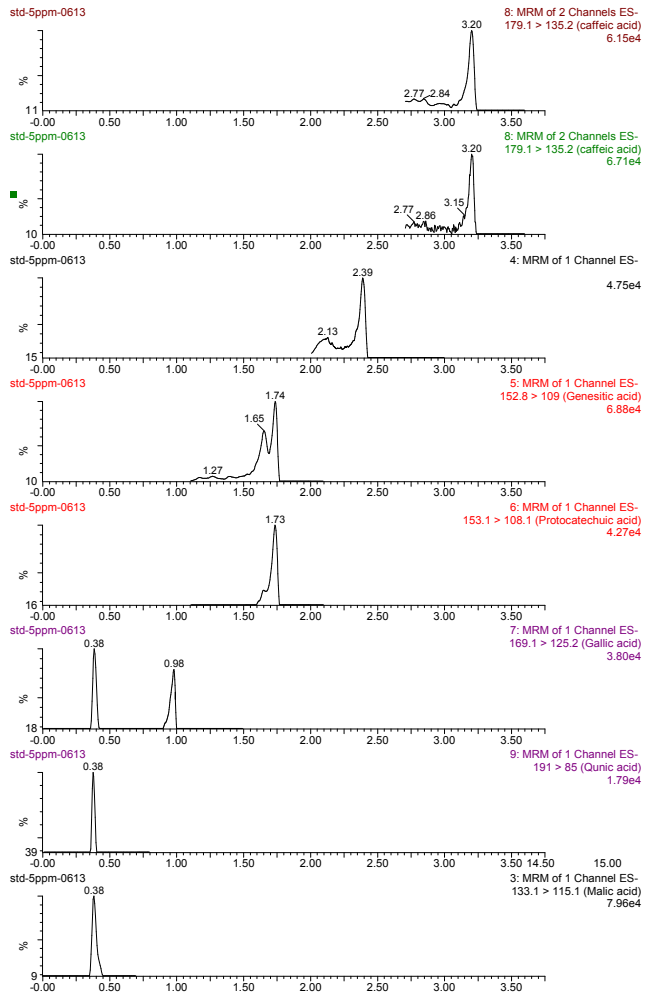

## Standard 2

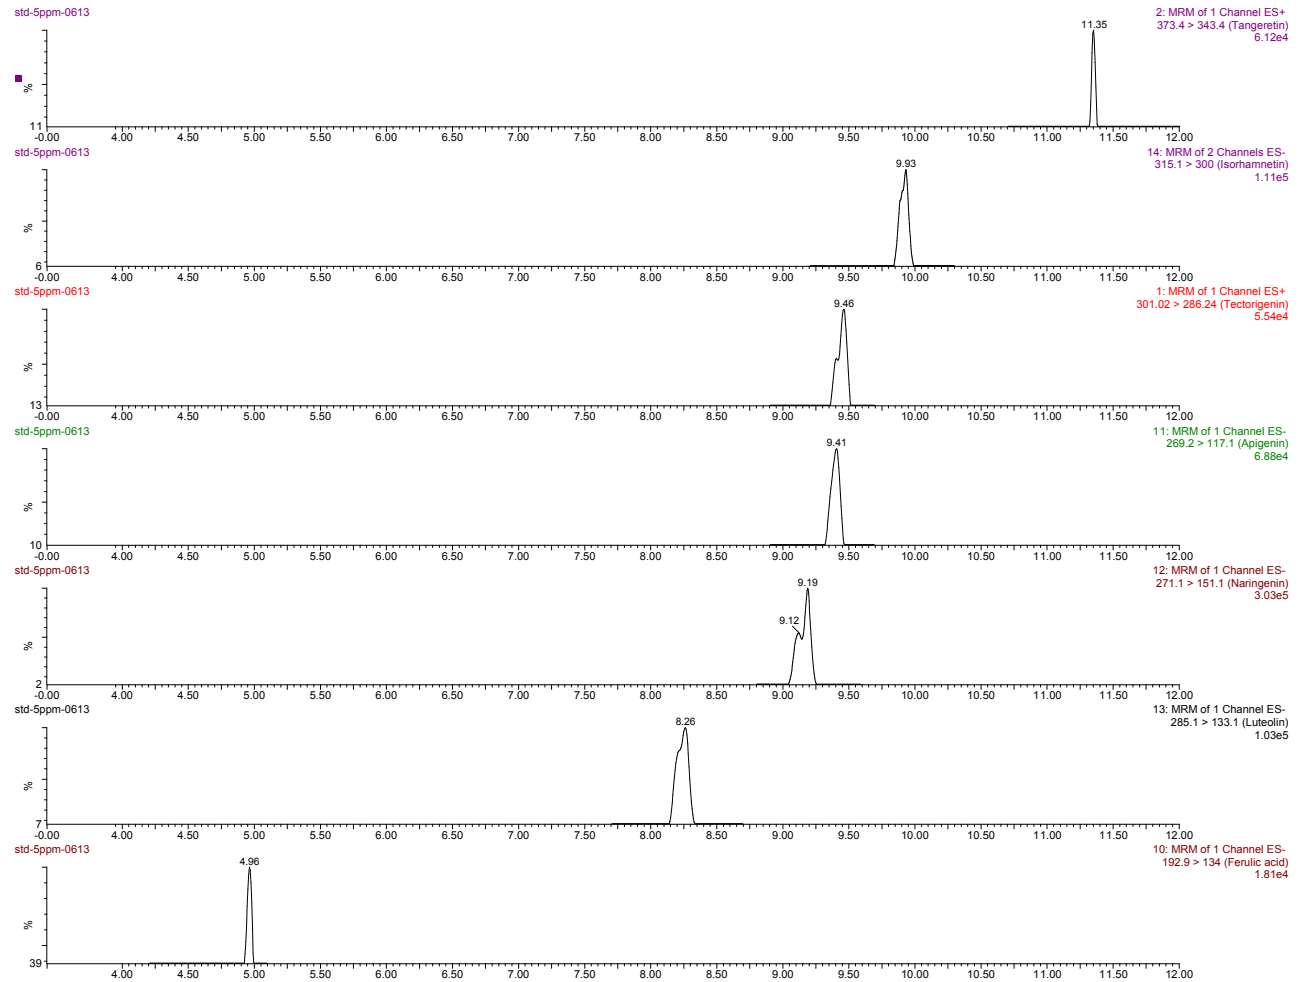

# SUPPLEMENTARY FIGURE 1

## KPE 1

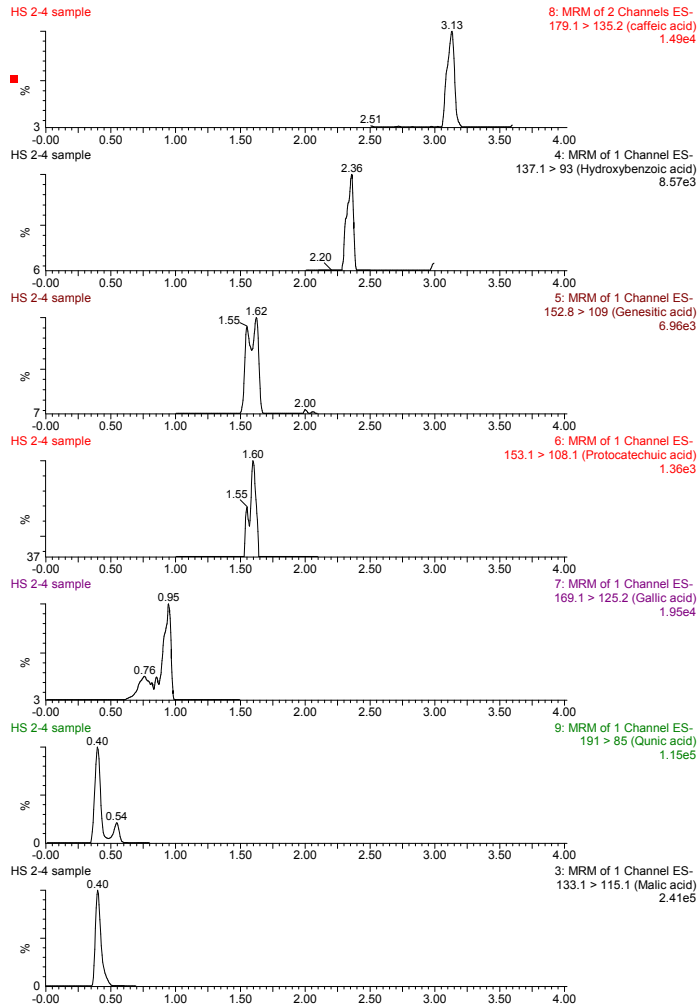

## KPE 2

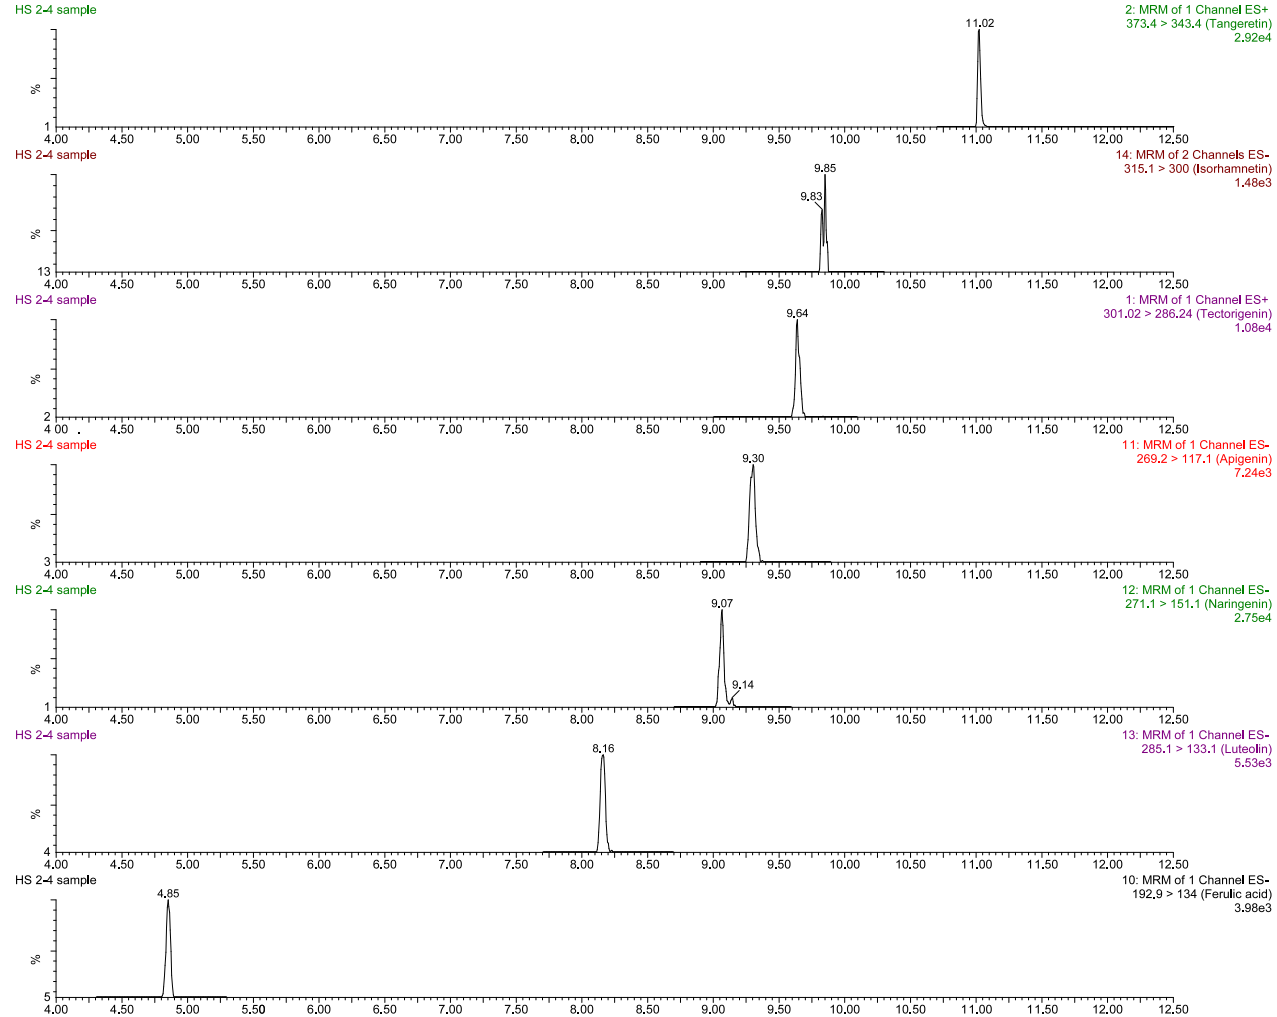

Supplement: f1 [file 5967150.f1.pdf]
